# Supplementary material for: Research activities contributing to evidence-based practice implementation in Japanese rehabilitation professionals
Source: PubMed Central journal article supplement — J Phys Ther Sci. 2023 May 1;35(5):340–5. doi: 10.1589/jpts.35.340 (PMC10149304; doi:10.1589/jpts.35.340), 2023-05-01
Supplement: jpts-35-340-s001.pdf [file jpts-35-340-s001.pdf]

Supplementary material 1. Frequency distribution of research achievements of participants during the last 5 years

| Item                                                                                               | Responses, n (%)  |
|----------------------------------------------------------------------------------------------------|-------------------|
| Number of papers or presentations of case studies as a coauthor during the last 5 years            | None, 150 (89.8%) |
|                                                                                                    | 1, 9 (5.4%)       |
|                                                                                                    | 2, 3 (1.8%)       |
|                                                                                                    | 3, 0 (0%)         |
|                                                                                                    | 4, 0 (0%)         |
|                                                                                                    | 5, 2 (1.2%)       |
|                                                                                                    | 6, 0 (0%)         |
|                                                                                                    | 7, 1 (0.6%)       |
|                                                                                                    | 8, 0 (0.6%)       |
|                                                                                                    | 9, 0 (0%)         |
|                                                                                                    | 10, 1 (0.6%)      |
| 11, 1 (0.6%)                                                                                       |                   |
| Number of papers or presentations of case studies as a first author during the last 5 years        | None, 148 (88.6%) |
|                                                                                                    | 1, 11 (6.6%)      |
|                                                                                                    | 2, 3 (1.8%)       |
|                                                                                                    | 3, 1 (0.6%)       |
|                                                                                                    | 4, 1 (0.6%)       |
|                                                                                                    | 5, 0 (0%)         |
|                                                                                                    | 6, 1 (0.6%)       |
|                                                                                                    | 7, 1 (1.3%)       |
|                                                                                                    | 8, 0 (0%)         |
|                                                                                                    | 9, 0 (0%)         |
| 10, 1 (0.6%)                                                                                       |                   |
| Number of papers or presentations of literature reviews as a coauthor during the last 5 years      | None, 163 (97.6%) |
|                                                                                                    | 1, 0 (0%)         |
|                                                                                                    | 2, 1 (0.6%)       |
|                                                                                                    | 3, 1 (0.6%)       |
|                                                                                                    | 4, 0 (0%)         |
|                                                                                                    | 5, 0 (0%)         |
|                                                                                                    | 6, 0 (0.6%)       |
|                                                                                                    | 7, 1 (0.6%)       |
| 8, 1 (0.6%)                                                                                        |                   |
| Number of papers or presentations of literature reviews as a first author during the last 5 years  | None, 163 (97.6%) |
|                                                                                                    | 1, 3 (1.8%)       |
|                                                                                                    | 2, 0 (0%)         |
| Number of papers or presentations of cross-sectional studies as a coauthor during the last 5 years | 3, 1 (0.6%)       |
|                                                                                                    | None, 154 (92.2%) |
|                                                                                                    | 1, 4 (2.4%)       |
| 2, 5 (3.0%)                                                                                        |                   |
| 3, 3 (1.8%)                                                                                        |                   |

|                                                                                                        |                   |
|--------------------------------------------------------------------------------------------------------|-------------------|
|                                                                                                        | 4, 0 (0%)         |
|                                                                                                        | 5, 1 (0.6%)       |
| Number of papers or presentations of cross-sectional studies as a first author during the last 5 years | None, 158 (94.6%) |
|                                                                                                        | 1, 4 (2.4%)       |
|                                                                                                        | 2, 2 (1.2%)       |
|                                                                                                        | 3, 1 (0.6%)       |
|                                                                                                        | 4, 1 (0.6%)       |
|                                                                                                        | 5, 0 (0%)         |
|                                                                                                        | 6, 1 (0.6%)       |
| Number of papers or presentations of longitudinal studies as a coauthor during the last 5 years        | None, 163 (97.6%) |
|                                                                                                        | 1, 1 (3.0%)       |
|                                                                                                        | 2, 1 (3.6%)       |
|                                                                                                        | 3, 1 (1.2%)       |
|                                                                                                        | 4, 0 (0.6%)       |
|                                                                                                        | 5, 0 (0%)         |
|                                                                                                        | 6, 0 (0.6%)       |
|                                                                                                        | 7, 0 (0%)         |
|                                                                                                        | 8, 0 (0%)         |
|                                                                                                        | 9, 1 (0.6%)       |
| Number of papers or presentations of longitudinal studies as a first author during the last 5 years    | None, 161 (96.4%) |
|                                                                                                        | 1, 1 (0.6%)       |
|                                                                                                        | 2, 4 (2.4%)       |
|                                                                                                        | 3, 1 (0.6%)       |

Supplementary material 2. Results of multiple regression modeling for the Health Sciences Evidence-based practice scores

Dimension 1

| Model | Variables                           | Unstandardized Coefficients (B) (95% Confidence Intervals) | Standardized Coefficients ( $\beta$ ) | p-value |
|-------|-------------------------------------|------------------------------------------------------------|---------------------------------------|---------|
| 1     | (Constant)                          | 6.856 (5.664–8.047)                                        |                                       | <0.001  |
|       | Gender                              | 0.138 (-0.310–0.585)                                       | 0.048                                 | 0.545   |
|       | Highest degree                      | 0.267 (-0.091–0.624)                                       | 0.115                                 | 0.142   |
|       | Clinical experience in primary care | 0.166 (-0.002–0.334)                                       | 0.154                                 | 0.053   |
|       | Number of therapists at work        | 0.023 (-0.251–0.297)                                       | 0.013                                 | 0.868   |

Model 1:  $R^2 = 0.038$ , analysis of variance  $p = 0.173$ ,  $R^2$  changes = 0.038,  $F$  changes = 1.615, significance of  $F$  changes = 0.173, Durbin-Watson = 1.795

Dimension 2

| Model | Variables                                      | Unstandardized Coefficients (B) (95% Confidence Intervals) | Standardized Coefficients ( $\beta$ ) | p-value |
|-------|------------------------------------------------|------------------------------------------------------------|---------------------------------------|---------|
| 1     | (Constant)                                     | 4.846 (3.370–6.321)                                        |                                       | <0.001  |
|       | Gender                                         | -0.156 (-0.711–0.398)                                      | -0.044                                | 0.578   |
|       | Highest degree                                 | 0.338 (-0.104–0.781)                                       | 0.119                                 | 0.133   |
|       | Clinical experience in primary care            | -0.058 (-0.266–0.151)                                      | -0.044                                | 0.584   |
|       | Number of therapists at work                   | -0.005 (-0.345–0.335)                                      | -0.002                                | 0.977   |
| 2     | (Constant)                                     | 5.062 (3.655–6.469)                                        |                                       | <0.001  |
|       | Gender                                         | -0.147 (-0.675–0.380)                                      | -0.042                                | 0.582   |
|       | Highest degree                                 | 0.218 (-0.206–0.643)                                       | 0.077                                 | 0.311   |
|       | Clinical experience in primary care            | -0.143 (-0.345–0.060)                                      | -0.108                                | 0.166   |
|       | Number of therapists at work                   | -0.046 (-0.370–0.278)                                      | -0.021                                | 0.780   |
|       | Number of case studies during the last 5 years | 0.267 (0.143–0.392)                                        | 0.322                                 | <0.001  |
| 3     | (Constant)                                     | 5.257 (3.854–6.660)                                        |                                       | <0.001  |
|       | Gender                                         | -0.181 (-0.704–0.341)                                      | -0.051                                | 0.494   |
|       | Highest degree                                 | 0.157 (-0.266–0.581)                                       | 0.055                                 | 0.464   |
|       | Clinical experience in primary care            | -0.169 (-0.371–0.032)                                      | -0.128                                | 0.099   |

|                                                           |                       |        |       |
|-----------------------------------------------------------|-----------------------|--------|-------|
| Number of therapists at work                              | -0.082 (-0.403–0.240) | -0.037 | 0.617 |
| Number of case studies during the last 5 years            | 0.216 (0.084–0.348)   | 0.260  | 0.001 |
| Number of cross-sectional studies during the last 5 years | 0.269 (0.022–0.516)   | 0.175  | 0.033 |

Model 1:  $R^2 = 0.020$ , analysis of variance  $p = 0.523$ ,  $R^2$  changes = 0.020,  $F$  changes = 0.806, significance of  $F$  changes = 0.523

Model 2:  $R^2 = 0.118$ , analysis of variance  $p = 0.001$ ,  $R^2$  changes = 0.099,  $F$  changes = 17.995, significance of  $F$  changes < 0.001

Model 3:  $R^2 = 0.143$ , analysis of variance  $p < 0.001$ ,  $R^2$  changes = 0.025,  $F$  changes = 4.628, significance of  $F$  changes = 0.033, Durbin-Watson = 1.642

#### Dimension 3

| Model | Variables                                      | Unstandardized Coefficients ( $B$ ) (95% Confidence Intervals) | Standardized Coefficients ( $\beta$ ) | $p$ -value |
|-------|------------------------------------------------|----------------------------------------------------------------|---------------------------------------|------------|
| 1     | (Constant)                                     | 5.846 (4.620–7.073)                                            |                                       | <0.001     |
|       | Gender                                         | -0.250 (-0.711–0.211)                                          | -0.085                                | 0.285      |
|       | Highest degree                                 | 0.008 (-0.360–0.376)                                           | 0.003                                 | 0.967      |
|       | Clinical experience in primary care            | 0.148 (-0.025–0.322)                                           | 0.135                                 | 0.093      |
|       | Number of therapists at work                   | 0.109 (-0.174–0.391)                                           | 0.060                                 | 0.448      |
| 2     | (Constant)                                     | 6.005 (4.821–7.189)                                            |                                       | <0.001     |
|       | Gender                                         | -0.243 (-0.687–0.200)                                          | -0.083                                | 0.280      |
|       | Highest degree                                 | -0.080 (-0.437–0.277)                                          | -0.034                                | 0.658      |
|       | Clinical experience in primary care            | 0.086 (-0.084–0.257)                                           | 0.078                                 | 0.318      |
|       | Number of therapists at work                   | 0.079 (-0.194–0.351)                                           | 0.043                                 | 0.569      |
|       | Number of case studies during the last 5 years | 0.196 (0.091–0.301)                                            | 0.283                                 | <0.001     |

Model 1:  $R^2 = 0.024$ , analysis of variance  $p = 0.412$ ,  $R^2$  changes = 0.024,  $F$  changes = 0.996, significance of  $F$  changes = 0.412

Model 2:  $R^2 = 0.100$ , analysis of variance  $p = 0.004$ ,  $R^2$  changes = 0.076,  $F$  changes = 13.636, significance of  $F$  changes < 0.001, Durbin-Watson = 1.889

#### Dimension 4

| Model | Variables | Unstandardized | Standardized | $p$ -value |
|-------|-----------|----------------|--------------|------------|
|-------|-----------|----------------|--------------|------------|

|   |                                                                  | Coefficients ( <i>B</i> ) (95%<br>Confidence Intervals) | Coefficients ( $\beta$ ) |        |
|---|------------------------------------------------------------------|---------------------------------------------------------|--------------------------|--------|
| 1 | (Constant)                                                       | 5.135 (3.866–6.404)                                     |                          | <0.001 |
|   | Gender                                                           | -0.273 (-0.479–<br>0.204)                               | -0.089                   | 0.261  |
|   | Highest degree                                                   | -0.120 (-0.500–<br>0.261)                               | -0.049                   | 0.535  |
|   | Clinical experience in<br>primary care                           | 0.002 (-0.177–0.181)                                    | 0.002                    | 0.982  |
|   | Number of therapists<br>at work                                  | 0.234 (-0.058–0.526)                                    | 0.123                    | 0.116  |
| 2 | (Constant)                                                       | 5.374 (4.114–6.635)                                     |                          | <0.001 |
|   | Gender                                                           | -0.305 (-0.774–<br>0.164)                               | -0.100                   | 0.201  |
|   | Highest degree                                                   | -0.205 (-0.584–<br>0.175)                               | -0.084                   | 0.288  |
|   | Clinical experience in<br>primary care                           | -0.042 (-0.221–<br>0.138)                               | -0.036                   | 0.647  |
|   | Number of therapists<br>at work                                  | 0.190 (-0.100–0.479)                                    | 0.100                    | 0.197  |
|   | Number of cross-<br>sectional studies during<br>the last 5 years | 0.272 (0.065–0.479)                                     | 0.205                    | 0.010  |

Model 1:  $R^2 = 0.028$ , analysis of variance  $p = 0.325$ ,  $R^2$  changes = 0.028,  $F$  changes = 1.172, significance of  $F$  changes = 0.325

Model 2:  $R^2 = 0.067$ , analysis of variance  $p = 0.046$ ,  $R^2$  changes = 0.039,  $F$  changes = 6.726, significance of  $F$  changes = 0.010, Durbin-Watson = 1.947

#### Dimension 5

| Model | Variables                              | Unstandardized<br>Coefficients ( <i>B</i> ) (95%<br>Confidence Intervals) | Standardized<br>Coefficients ( $\beta$ ) | <i>p</i> -value |
|-------|----------------------------------------|---------------------------------------------------------------------------|------------------------------------------|-----------------|
| 1     | (Constant)                             | 5.692 (4.272–7.113)                                                       |                                          | <0.001          |
|       | Gender                                 | -0.617 (-1.515–<br>0.083)                                                 | -0.180                                   | 0.024           |
|       | Highest degree                         | -0.105 (-0.531–<br>0.321)                                                 | -0.038                                   | 0.626           |
|       | Clinical experience in<br>primary care | 0.073 (-0.128–0.273)                                                      | 0.057                                    | 0.476           |
|       | Number of therapists<br>at work        | -0.124 (-0.451–<br>0.203)                                                 | -0.058                                   | 0.455           |
| 2     | (Constant)                             | 5.970 (4.573–7.368)                                                       |                                          | <0.001          |
|       | Gender                                 | -0.659 (-1.180–<br>0.137)                                                 | -0.192                                   | 0.014           |

|                                                              |                           |        |       |
|--------------------------------------------------------------|---------------------------|--------|-------|
| Highest degree                                               | -0.229 (-0.652–<br>0.194) | -0.083 | 0.286 |
| Clinical experience in<br>primary care                       | 0.013 (-0.186–0.213)      | 0.010  | 0.894 |
| Number of therapists<br>at work                              | -0.159 (-0.478–<br>0.161) | -0.075 | 0.329 |
| Number of longitudinal<br>studies during the last 5<br>years | 0.390 (0.137–0.644)       | 0.238  | 0.003 |

Model 1:  $R^2 = 0.036$ , analysis of variance  $p = 0.195$ ,  $R^2$  changes = 0.036,  $F$  changes = 1.534, significance of  $F$  changes = 0.195

Model 2:  $R^2 = 0.089$ , analysis of variance  $p = 0.010$ ,  $R^2$  changes = 0.061,  $F$  changes = 9.281, significance of  $F$  changes = 0.003, Durbin-Watson = 1.630

Gender (0: women, 1: men); Highest degree (0: Career college, Junior college, or College, 1: Master degree or Doctoral degree); Clinical experience in primary care (0: <3 years, 1: 3-5 years, 2: 6-10 years, 3: 11-15 years, 4:  $\geq 16$  years); and Number of therapists at work (0: <3 people, 1: 3-5 people, 2: 6-10 people, 3: 11-15 people, 4:  $\geq 16$  people)

Supplementary material 3. Summary of responses to 31 questions regarding evidence-based practice (EBP) and clinical practice guidelines

| Item                                                                                                       | Responses, n (%)                                                                                                                                       |
|------------------------------------------------------------------------------------------------------------|--------------------------------------------------------------------------------------------------------------------------------------------------------|
| Item 1: Application of EBP is necessary in the clinical practice.                                          | Strongly agree, 33 (20.0%)<br>Agree, 103 (62.4%)<br>Neutral, 23 (13.9%)<br>Disagree, 5 (3.0%)<br>Strongly disagree, 0 (0%)<br>I don't know, 1 (0.6%)   |
| Item 2: I think it creates unreasonable demands to apply EBP in my daily work.                             | Strongly agree, 22 (13.3%)<br>Agree, 111 (67.3%)<br>Neutral, 24 (14.5%)<br>Disagree, 7 (4.2%)<br>Strongly disagree, 0 (0%)<br>I don't know, 1 (0.6%)   |
| Item 3: EBP does not take into account patient preference.                                                 | Strongly agree, 9 (5.5%)<br>Agree, 61 (37.0%)<br>Neutral, 67 (40.6%)<br>Disagree, 25 (15.2%)<br>Strongly disagree, 1 (0.6%)<br>I don't know, 2 (1.2%)  |
| Item 4: EBP improves the quality of patient care.                                                          | Strongly agree, 21 (12.7%)<br>Agree, 119 (72.1%)<br>Neutral, 22 (13.3%)<br>Disagree, 2 (1.2%)<br>Strongly disagree, 0 (0%)<br>I don't know, 1 (0.6%)   |
| Item 5: My reimbursement rate will increase if I incorporate EBP into my practice.                         | Strongly agree, 16 (9.7%)<br>Agree, 72 (43.6%)<br>Neutral, 51 (30.9%)<br>Disagree, 14 (8.5%)<br>Strongly disagree, 1 (0.6%)<br>I don't know, 11 (6.7%) |
| Item 6: I am interested in learning or improving the skills necessary to incorporate EBP into my practice. | Strongly agree, 32 (19.4%)<br>Agree, 102 (61.8%)<br>Neutral, 24 (14.5%)<br>Disagree, 6 (3.6%)<br>Strongly disagree, 0 (0%)<br>I don't know, 1 (0.6%)   |
| Item 7: At my place of work, the use of current EBP is encouraged.                                         | Strongly agree, 3 (1.8%)<br>Agree, 54 (33.1%)<br>Neutral, 70 (42.9%)<br>Disagree, 14 (8.6%)                                                            |

|                                                                                                                      |                                                                                                                                                        |
|----------------------------------------------------------------------------------------------------------------------|--------------------------------------------------------------------------------------------------------------------------------------------------------|
|                                                                                                                      | Strongly disagree, 2 (1.2%)<br>I don't know, 20 (12.3%)                                                                                                |
| Item 8: Current research helps me making decisions about patient care.                                               | Strongly agree, 4 (2.4%)<br>Agree, 44 (26.7%)<br>Neutral, 64 (38.8%)<br>Disagree, 43 (26.1%)<br>Strongly disagree, 3 (1.8%)<br>I don't know, 7 (4.2%)  |
| Item 9: I feel confident in my ability to find relevant research to answer my clinical questions.                    | Strongly agree, 9 (%)<br>Agree, 112 (67.9%)<br>Neutral, 32 (19.4%)<br>Disagree, 11 (6.7%)<br>Strongly disagree, 0 (0%)<br>I don't know, 1 (0.6%)       |
| Item 10: I leaned the foundations for EBP as part of my academic preparation.                                        | Yes, 15 (9.1%)<br>Partially, 94 (57.3%)<br>No, 55 (33.5%)                                                                                              |
| Item 11: I received formal training in critical appraisal of research literature as part of my academic preparation. | Yes, 10 (6.1%)<br>Partially, 70 (42.4%)<br>No, 85 (51.5%)                                                                                              |
| Item 12: I am confident in my ability to critically review professional literature.                                  | Strongly agree, 2 (1.2%)<br>Agree, 12 (7.3%)<br>Neutral, 21 (12.7%)<br>Disagree, 75 (45.5%)<br>Strongly disagree, 52 (31.5%)<br>I don't know, 3 (1.8%) |
| Item 13: I am confident in my ability to find relevant research to answer my clinical questions.                     | Strongly agree, 2 (1.2%)<br>Agree, 27 (16.4%)<br>Neutral, 55 (33.3%)<br>Disagree, 63 (38.2%)<br>Strongly disagree, 14 (8.5%)<br>I don't know, 4 (2.4%) |
| Item 14: I am familiar with the medical search engines (e.g., Ichushi, Pubmed, etc.).                                | Strongly agree, 1 (0.6%)<br>Agree, 15 (9.1%)<br>Neutral, 49 (29.7%)<br>Disagree, 64 (38.8%)<br>Strongly disagree, 32 (19.4%)<br>I don't know, 4 (2.4%) |
| Item 15: Number of scientific articles related to my clinical work that I                                            | ≤1 article, 56 (33.9%)<br>2-5 articles, 84 (50.9%)<br>6-10 articles, 18 (10.9%)                                                                        |



|                                                                                                                                             |                                                                                                                                                       |
|---------------------------------------------------------------------------------------------------------------------------------------------|-------------------------------------------------------------------------------------------------------------------------------------------------------|
| read, during a typical month.                                                                                                               | 11-15 articles, 4 (2.4%)<br>16+ articles, 2 (1.2%)                                                                                                    |
| Item 16: Number of times I use PubMed or other databases to search literature that is relevant to my clinical work, during a typical month. | ≤1 time, 64 (38.8%)<br>2-5 times, 71 (43.0%)<br>6-10 times, 19 (11.5%)<br>11-15 times, 2 (1.2%)<br>16+ times, 8 (4.8%)                                |
| Item 17: I'm aware that evidence-based guidelines for diagnoses relevant to my work exist.                                                  | Yes, 87 (52.4%)<br>Partially, 64 (38.6%)<br>No, 15 (9.0%)                                                                                             |
| Item 18: I use evidence-based guidelines in my work.                                                                                        | Yes, 72 (43.4%)<br>No, 71 (42.8%)<br>I don't know, 23 (13.9%)                                                                                         |
| Item 19: By the use of clinical practice guidelines, I was able to have confidence in the clinical setting.                                 | Yes, 6 (6.7%)<br>Partially, 73 (81.1%)<br>No, 7 (7.8%)<br>I don't know, 4 (4.4%)                                                                      |
| Item 20: By the use of clinical practice guidelines, communication with other occupations has been facilitated.                             | Yes, 6 (6.5%)<br>Partially, 43 (46.7%)<br>No, 27 (29.3%)<br>I don't know, 16 (17.4%)                                                                  |
| Item 21: I consider it important to use evidence-based guidelines in my work.                                                               | Strongly agree, 16 (9.9%)<br>Agree, 96 (59.3%)<br>Neutral, 40 (24.7%)<br>Disagree, 3 (1.9%)<br>Strongly disagree, 1 (0.6%)<br>I don't know, 5 (3.1%)  |
| Item 22: I have fast and easy access to relevant evidence-based guidelines at my place of work.                                             | Strongly agree, 39 (24.1%)<br>Agree, 87 (53.7%)<br>Neutral, 25 (15.4%)<br>Disagree, 6 (3.7%)<br>Strongly disagree, 1 (0.6%)<br>I don't know, 4 (2.5%) |
| Item 23: Evidence-based guidelines are important to facilitate my work.                                                                     | Strongly agree, 12 (7.4%)<br>Agree, 71 (43.8%)<br>Neutral, 57 (35.2%)<br>Disagree, 8 (4.9%)<br>Strongly disagree, 2 (1.2%)<br>I don't know, 12 (7.4%) |
| Item 24: Evidence-based                                                                                                                     | Strongly agree, 15 (9.3%)                                                                                                                             |

|                                                                                            |                                                                                                                                                        |
|--------------------------------------------------------------------------------------------|--------------------------------------------------------------------------------------------------------------------------------------------------------|
| guidelines are important so that the patients receive the best possible treatment.         | Agree, 84 (51.9%)<br>Neutral, 46 (28.4%)<br>Disagree, 9 (5.6%)<br>Strongly disagree, 0 (0%)<br>I don't know, 8 (4.9%)                                  |
| Item 25: Evidence-based guidelines are important so that patients receive equal treatment. | Strongly agree, 18 (11.1%)<br>Agree, 86 (53.1%)<br>Neutral, 41 (25.3%)<br>Disagree, 6 (3.7%)<br>Strongly disagree, 0 (0%)<br>I don't know, 11 (6.8%)   |
| Item 26: I can integrate the patients' preferences with evidence-based guidelines.         | Strongly agree, 5 (3.1%)<br>Agree, 42 (25.9%)<br>Neutral, 67 (41.4%)<br>Disagree, 27 (16.7%)<br>Strongly disagree, 5 (3.1%)<br>I don't know, 16 (9.9%) |
| Item 27-a: My understanding of the following term is: Relative risk.                       | Understand completely, 6 (3.6%)<br>Understand somewhat, 75 (45.5%)<br>Do not understand, 58 (35.2%)<br>Do not know term in itself, 26 (15.8%)          |
| Item 27-b: My understanding of the following term is: Absolute risk.                       | Understand completely, 9 (5.5%)<br>Understand somewhat, 72 (43.6%)<br>Do not understand, 57 (34.5%)<br>Do not know term in itself, 27 (16.4%)          |
| Item 27-c: My understanding of the following term is: Systematic review.                   | Understand completely, 12 (7.3%)<br>Understand somewhat, 60 (36.6%)<br>Do not understand, 64 (39.0%)<br>Do not know term in itself, 28 (17.1%)         |
| Item 27-d: My understanding of the following term is: Odds ratio.                          | Understand completely, 5 (3.0%)<br>Understand somewhat, 52 (31.5%)<br>Do not understand, 87 (52.7%)<br>Do not know term in itself, 21 (12.7%)          |
| Item 27-e: My understanding of the following term is: Meta-analysis.                       | Understand completely, 8 (4.8%)<br>Understand somewhat, 51 (30.9%)<br>Do not understand, 80 (48.5%)<br>Do not know term in itself, 26 (15.8%)          |
| Item 27-f: My understanding of the following term is: Confidence interval.                 | Understand completely, 8 (4.8%)<br>Understand somewhat, 62 (37.6%)<br>Do not understand, 70 (42.4%)<br>Do not know term in itself, 25 (15.2%)          |
| Item 27-g: My understanding of the following term is:                                      | Understand completely, 2 (1.2%)<br>Understand somewhat, 12 (7.3%)<br>Do not understand, 106 (64.2%)                                                    |

|                                                                                                                        |                                                                                                                                                                                                                                                                                                                                                                                                                                                                                                                                                   |
|------------------------------------------------------------------------------------------------------------------------|---------------------------------------------------------------------------------------------------------------------------------------------------------------------------------------------------------------------------------------------------------------------------------------------------------------------------------------------------------------------------------------------------------------------------------------------------------------------------------------------------------------------------------------------------|
| Heterogeneity.                                                                                                         | Do not know term in itself, 45 (27.3%)                                                                                                                                                                                                                                                                                                                                                                                                                                                                                                            |
| Item 27-h: My understanding of the following term is: Publication bias.                                                | Understand completely, 6 (3.7%)<br>Understand somewhat, 38 (23.2%)<br>Do not understand, 78 (47.6%)<br>Do not know term in itself, 42 (25.6%)                                                                                                                                                                                                                                                                                                                                                                                                     |
| Item 27-i: My understanding of the following term is: Critical appraisal.                                              | Understand completely, 5 (3.0%)<br>Understand somewhat, 65 (39.4%)<br>Do not understand, 70 (42.4%)<br>Do not know term in itself, 25 (15.2%)                                                                                                                                                                                                                                                                                                                                                                                                     |
| Item 27-j: My understanding of the following term is: Cost-effectiveness.                                              | Understand completely, 14 (8.5%)<br>Understand somewhat, 64 (38.8%)<br>Do not understand, 64 (38.8%)<br>Do not know term in itself, 23 (13.9%)                                                                                                                                                                                                                                                                                                                                                                                                    |
| Item 28: I have the ability to access relevant databases and the Internet at my facility.                              | Yes, 100 (61.3%)<br>No, 30 (18.4%)<br>I don't know, 33 (20.2%)                                                                                                                                                                                                                                                                                                                                                                                                                                                                                    |
| Item 29: I have the ability to access relevant databases and the Internet at home or locations other than my facility. | Yes, 97 (59.5%)<br>Partially, 37 (22.7%)<br>No, 29 (17.8%)                                                                                                                                                                                                                                                                                                                                                                                                                                                                                        |
| Item 30: I know how and where to find evidence-based guidelines related to my work on the Internet.                    | Yes, 45 (27.8%)<br>Partially, 74 (45.7%)<br>No, 43 (26.5%)                                                                                                                                                                                                                                                                                                                                                                                                                                                                                        |
| Item 31: Indicate the barriers to updating your clinical practice with new knowledge.                                  | Insufficient time, 71 (44.4%)<br>Lack of research skills, 70 (43.8%)<br>Don't know where to find guidelines, 24 (15.0%)<br>Takes too long to read guidelines, 86 (53.8%)<br>Guidelines are too general and too unspecific, 51 (31.9%)<br>Guidelines are too verbose and do not let me decide what is most appropriate, 34 (21.3%)<br>Inability to apply research findings to individual patients with unique characteristics, 11 (6.9%)<br>Lack of collective support among my colleagues in my facility, 5 (3.1%)<br>Lack of interest, 15 (9.4%) |
